# Supplementary material for: Determinants of neonatal sepsis among neonates admitted to neonatal intensive care units in Ethiopian Hospitals: A systematic review and meta-analysis
Source: Research Square preprint supplement (doi:10.21203/rs.3.rs-1625170/v1), 2022-06-03
Supplement: Supplementary file 1 [file 1dc5eef8760e2d6ab3296df2.docx]

Additional file 1: example of searches for PubMed, Hinari and Google scholar to assess association between the given independent variables and Neonatal sepsis among newborns in Ethiopia.

| Databases | Search terms | Number of studies | Date |
| --- | --- | --- | --- |
| PubMed/MEDLINE | ((((neonatal[Title]) OR (neonatal[MeSH Terms])) AND (sepsis[MeSH Terms])) OR (sepsis[Title])) AND (Ethiopia[Title]) | 52 | 3/31/22 |
| Hinari | (TitleCombined:(neonatal)) AND (TitleCombined:(sepsis)) AND (TitleCombined:(Ethiopia)) | 23 | 2/16/22 |
| Google scholar | Neonatal AND sepsis AND Ethiopia | 50 | 2/16/22 |
| Others (grey literature (electronic library of AAU and Google) |  | 5 | 3/16/22 |
| Total retrieved articles |  | 130 |  |

During searching Hinari, the following are applied

- Content type included was-journal article
- The chosen Discipline (ticked) -medicine, public health and nursing
- Exclude from results: newspaper articles and book review
- Language=English
